# Supplementary material
Source: PubMed Central journal article supplement (PMC7099836)
Supplement: NIHMS1060965-supplement-4.pdf [file NIHMS1060965-supplement-4.pdf]

Supplemental Table 1. Descriptive Statistics

| <b>Variables</b>                    | <b>Total Sample</b> | <b>Categorical Puberty Categories</b> |                                 |
|-------------------------------------|---------------------|---------------------------------------|---------------------------------|
|                                     |                     | <b>Pre-/Early Pubertal Group</b>      | <b>Mid-/Late Pubertal Group</b> |
| <b><u>Sample Sizes:</u></b>         |                     |                                       |                                 |
| MZ Twins                            | 466                 | 302                                   | 164                             |
| DZ Twins                            | 460                 | 291                                   | 169                             |
| <b><i>Total</i></b>                 | <b>926</b>          | <b>593</b>                            | <b>333</b>                      |
| <b><u>Age:</u></b>                  |                     |                                       |                                 |
| Range                               | 8-16                | 8-15                                  | 9-16                            |
| Mean (SD)                           | 11.71 (2.01)        | 10.60 (1.34)                          | 13.68 (1.39)                    |
| <b><u>Body Mass Index:</u></b>      |                     |                                       |                                 |
| Range                               | 10.70-46.55         | 10.70-39.82                           | 14.28-46.55                     |
| Mean (SD)                           | 19.48 (4.50)        | 17.99 (3.58)                          | 22.15 (4.75)                    |
| <b><u>PDS Scores:</u></b>           |                     |                                       |                                 |
| Range                               | 1.00-4.00           | 1.00-2.40                             | 2.60-4.00                       |
| Mean (SD)                           | 2.22 (0.88)         | 1.63 (0.43)                           | 3.26 (0.40)                     |
| <b><u>MEBS Total Score:</u></b>     |                     |                                       |                                 |
| Range (max score = 30)              | 0-27                | 0-25                                  | 0-27                            |
| Mean (SD)                           | 4.42 (4.64)         | 3.93 (4.10)                           | 5.30 (5.37)                     |
| Alphas                              | .87                 | .87                                   | .86                             |
| % above the clinical cut-off        | 3.9%                | 2.6%                                  | 6.6%                            |
| <b><u>Body Dissatisfaction:</u></b> |                     |                                       |                                 |
| Range (max score = 6)               | 0-6                 | 0-6                                   | 0-6                             |
| Mean (SD)                           | .95 (1.49)          | 0.69 (1.20)                           | 1.42 (1.80)                     |
| Alphas                              | .77                 | .79                                   | .75                             |
| <b><u>Weight/Shape Concerns</u></b> |                     |                                       |                                 |
| Range (max score = 12)              | 0-5.58              | 0-5.50                                | 0-5.88                          |
| Mean (SD)                           | .75 (1.07)          | .58 (.90)                             | 1.07 (1.27)                     |
| Alphas                              | .92                 | .90                                   | .93                             |
| <b><u>Weight Preoccupation:</u></b> |                     |                                       |                                 |
| Range (max score = 8)               | 0-8                 | 0-8                                   | 0-8                             |
| Mean (SD)                           | 1.73 (2.01)         | 1.61 (1.92)                           | 1.94 (2.15)                     |
| Alphas                              | .78                 | .77                                   | .79                             |

Note: MZ= monozygotic; DZ= dizygotic; SD = standard deviation; PDS = Pubertal Development Scale; MEBS= Minnesota Eating Behavior Survey; % above clinical cut off = the percentage of twins who score above the clinical cut-off (score = 15.55) for the MEBS Total Score (see von Ranson et al., 2005). Pubertal group status was determined using an established cut-off (pre-early puberty: PDS score <2.5; mid-late puberty: PDS score ≥ 2.5) used in in past research (e.g., Culbert et al., 2009; Klump et al., 2003). Sample sizes indicate the number of twins (not number of twin pairs).

\* $p < .05$ , \*\* $p < .01$ .

Supplemental Table 2. Phenotypic Correlations between Weight and Shape Concerns Subscales and MEBS Total Score (N=926 individual twins)

|                       | Body Dissatisfaction |                   | Weight/Shape Concerns |                   | Weight Preoccupation |                   |
|-----------------------|----------------------|-------------------|-----------------------|-------------------|----------------------|-------------------|
|                       | r                    | % shared variance | r                     | % shared variance | r                    | % shared variance |
| Weight/Shape Concerns | .70***               | 49.0              | 1.00                  | -                 | -                    | -                 |
| Weight Preoccupation  | .57***               | 32.5              | .70***                | 49.0              | 1.00                 | -                 |
| Total Score           | .76***               | 57.8              | .79***                | 62.4              | .88***               | 77.4              |

*Note.* % variance = variance that overlaps between the two constructs (i.e.,  $r^2$ )

\*\*\* $p < .001$

Supplemental Table 3. Model Fit Comparisons for Post-hoc Analyses that Regress Binge Eating Out of Weight/Shape Concerns and Regress Weight/Shape Concerns Out of Binge Eating (N=926 twins)

| Model                                                         | -2lnL (df)           | $\chi^2 \Delta$ (df) | <i>p</i>   | AIC           | BIC             | SABIC          | DIC            |
|---------------------------------------------------------------|----------------------|----------------------|------------|---------------|-----------------|----------------|----------------|
| <b>Body Dissatisfaction with Binge Eating Regressed Out</b>   |                      |                      |            |               |                 |                |                |
| Full Model                                                    | 2553.08(904)         |                      |            | 745.08        | -1497.71        | -63.18         | -666.99        |
| Nested Submodels:                                             |                      |                      |            |               |                 |                |                |
| <b>No moderation</b>                                          | <b>2560.33(910)</b>  | <b>7.25(6)</b>       | <b>.30</b> | <b>740.33</b> | <b>-1512.50</b> | <b>-68.45</b>  | <b>-676.27</b> |
| Constrain all nonlinear mods to 0                             | 2558.66(907)         | 5.58(3)              | .13        | 744.66        | -1504.13        | -64.84         | -670.65        |
| Constrain all nonlinear and linear A mods to 0                | 2559.38(908)         | 6.30(4)              | .18        | 743.38        | -1506.84        | -65.96         | -672.44        |
| Constrain all nonlinear and linear C mods to 0                | 2559.67(908)         | 6.59(4)              | .16        | 743.67        | -1506.70        | -65.82         | -672.30        |
| Constrain all nonlinear and linear E mods to 0                | 2558.91(908)         | 5.83(4)              | .21        | 742.91        | -1507.07        | -66.19         | -672.68        |
| Constrain AE nonlinear mods to 0                              | 2560.01(909)         | 6.93(5)              | .23        | 742.01        | -1509.59        | -67.12         | -674.28        |
| <b>Weight/ Shape Concerns with Binge Eating Regressed Out</b> |                      |                      |            |               |                 |                |                |
| Full Model                                                    | 2468.69(905)         |                      |            | 658.69        | -1542.98        | -106.86        | -711.34        |
| Nested Submodels:                                             |                      |                      |            |               |                 |                |                |
| <b>No moderation</b>                                          | <b>2478.89 (911)</b> | <b>10.20(6)</b>      | <b>.12</b> | <b>656.89</b> | <b>-1556.29</b> | <b>-110.65</b> | <b>-719.14</b> |
| Constrain all nonlinear mods to 0                             | 2474.92(908)         | 6.23(3)              | .10        | 658.92        | -1549.07        | -108.19        | -714.67        |
| Constrain all nonlinear and linear A mods to 0                | 2477.61(909)         | 8.92(4)              | .06        | 659.61        | -1550.79        | -108.33        | -715.48        |
| Constrain all nonlinear and linear C mods to 0                | 2474.92(909)         | 6.23(4)              | .18        | 656.92        | -1552.14        | -109.67        | -716.82        |
| Constrain all nonlinear and linear E mods to 0                | 2475.31(909)         | 6.62(4)              | .16        | 657.31        | -1551.94        | -109.48        | -716.63        |
| Constrain all nonlinear & CE linear mods to 0                 | 2475.31(910)         | 6.62(5)              | .25        | 655.31        | -1555.01        | -110.96        | -718.78        |
| <b>Weight Preoccupation with Binge Eating Regressed Out</b>   |                      |                      |            |               |                 |                |                |
| Full Model                                                    | 2545.82(904)         |                      |            | 737.82        | -1501.34        | -66.81         | -670.62        |
| Nested Submodels:                                             |                      |                      |            |               |                 |                |                |
| <b>No moderation</b>                                          | <b>2550.91(910)</b>  | <b>5.09(6)</b>       | <b>.53</b> | <b>730.91</b> | <b>-1517.21</b> | <b>-73.16</b>  | <b>-680.98</b> |
| Constrain all non-linear mods to 0                            | 2550.33(907)         | 4.51(3)              | .21        | 736.33        | -1508.30        | -69.00         | -674.82        |
| Constrain all A mods to 0                                     | 2549.21(906)         | 3.39(2)              | .18        | 737.21        | -1505.79        | -68.08         | -673.23        |
| Constrain all C mods to 0                                     | 2545.83(906)         | 0.01(2)              | .99        | 733.83        | -1507.48        | -69.77         | -674.92        |
| Constrain all E mods to 0                                     | 2546.07(906)         | 0.25(2)              | .88        | 734.07        | -1507.36        | -69.65         | -674.80        |
| Constrain A nonlinear mod to 0                                | 2548.79(905)         | 2.97(1)              | .08        | 738.79        | -1502.93        | -66.81         | -671.29        |
| Constrain E nonlinear mod to 0                                | 2545.82(905)         | 0.00(1)              | 1.00       | 735.82        | -1504.41        | -68.29         | -672.77        |
| Constrain A nonlinear and all E mods to 0                     | 2548.89(907)         | 3.07(3)              | .38        | 734.89        | -1509.02        | -69.72         | -675.54        |
| Constrain E nonlinear and all A mods to 0                     | 2549.37(907)         | 3.55(3)              | .31        | 735.37        | -1508.77        | -69.48         | -675.30        |

Supplemental Table 3 (Continued). Model Fit Comparisons for Post-hoc Analyses that Regress Binge Eating Out of Weight/Shape Concerns and Regress Weight/Shape Concerns Out of Binge Eating (N=926 twins)

| Model                                                        | -2lnL (df)          | $\chi^2 \Delta$ (df) | <i>p</i>   | AIC           | BIC             | SABIC         | DIC            |
|--------------------------------------------------------------|---------------------|----------------------|------------|---------------|-----------------|---------------|----------------|
| <b>Binge Eating with Body Dissatisfaction Regressed Out</b>  |                     |                      |            |               |                 |               |                |
| Full Model                                                   | 2529.29(904)        |                      |            | 721.29        | -1509.61        | -75.08        | -678.89        |
| Nested Submodels:                                            |                     |                      |            |               |                 |               |                |
| No moderation                                                | 2549.86(910)        | 20.57(6)             | <.01       | 729.86        | -1517.74        | -73.69        | -681.50        |
| Constrain all A mods to 0                                    | 2534.84(906)        | 5.55(2)              | .06        | 722.84        | -1512.26        | -75.26        | -680.41        |
| Constrain A nonlinear mod to 0                               | 2529.33(905)        | .04(1)               | .84        | 719.33        | -1512.66        | -76.54        | -681.02        |
| Constrain C nonlinear mod to 0                               | 2532.56(905)        | 3.27(1)              | .07        | 722.56        | -1511.04        | -74.93        | -679.41        |
| Constrain all E mods to 0                                    | 2531.08(906)        | 1.79(2)              | .41        | 719.08        | -1514.85        | -77.15        | -682.29        |
| <b>Constrain all E mods and nonlinear A to 0</b>             | <b>2531.34(907)</b> | <b>2.05(3)</b>       | <b>.56</b> | <b>717.34</b> | <b>-1517.79</b> | <b>-78.50</b> | <b>-684.31</b> |
| <b>Binge Eating with Weight/Shape Concerns Regressed Out</b> |                     |                      |            |               |                 |               |                |
| Full Model                                                   | 2561.50(909)        |                      |            | 743.50        | -1508.85        | -66.38        | -673.53        |
| Nested Submodels:                                            |                     |                      |            |               |                 |               |                |
| No moderation                                                | 2580.46(915)        | 18.96(6)             | <.01       | 750.46        | -1517.78        | -65.79        | -676.95        |
| Constrain all A mods to 0                                    | 2562.67(911)        | 1.17(2)              | .56        | 740.67        | -1514.40        | -68.76        | -677.25        |
| Constrain A nonlinear mod to 0                               | 2561.54(910)        | 0.04(1)              | .84        | 741.54        | -1511.90        | -67.84        | -675.66        |
| Constrain C nonlinear mod to 0                               | 2563.44(910)        | 1.94(1)              | .16        | 743.44        | -1510.94        | -66.89        | -674.71        |
| Constrain all E mods to 0                                    | 2565.17(911)        | 3.67(2)              | .16        | 743.17        | -1513.15        | -67.51        | -676.00        |
| <b>Constrain all E mods and nonlinear A to 0</b>             | <b>2565.35(912)</b> | <b>3.85(3)</b>       | <b>.28</b> | <b>741.35</b> | <b>-1516.13</b> | <b>-68.90</b> | <b>-678.06</b> |
| <b>Binge Eating with Weight Preoccupation Regressed Out</b>  |                     |                      |            |               |                 |               |                |
| Full Model                                                   | 2545.25(904)        |                      |            | 737.24        | -1501.63        | -67.10        | -670.91        |
| Nested Submodels:                                            |                     |                      |            |               |                 |               |                |
| No moderation                                                | 2568.26(910)        | 23.01(6)             | <.01       | 748.26        | -1508.54        | -64.49        | -672.30        |
| Constrain all A mods to 0                                    | 2548.56(906)        | 3.31(2)              | .19        | 736.56        | -1506.11        | -68.41        | -673.55        |
| Constrain A nonlinear mod to 0                               | 2545.86(905)        | .61(1)               | .43        | 735.86        | -1504.39        | -68.27        | -672.75        |
| Constrain C nonlinear mod to 0                               | 2545.41(905)        | .16(1)               | .69        | 735.41        | -1504.62        | -68.50        | -672.98        |
| Constrain all E mods to 0                                    | 2548.80(906)        | 3.55(2)              | .17        | 736.80        | -1505.99        | -68.29        | -673.43        |
| <b>Constrain all E mods and nonlinear A to 0</b>             | <b>2548.98(907)</b> | <b>3.73(3)</b>       | <b>.29</b> | <b>734.98</b> | <b>-1508.97</b> | <b>-69.68</b> | <b>-675.49</b> |

Note. -2lnL = minus twice the log-likelihood;  $\chi^2 \Delta$  = chi-square change; AIC = Akaike Information Criterion; Full Model = model with paths, linear, and quadratic moderators; A = additive genetic effects; C = shared environmental effects; E = nonshared environmental effects; mod(s) = moderator(s). Each nested submodel is compared to the full model when calculating the  $\chi^2 \Delta$  and degrees of freedom. The best-fitting models, as determined by a non-significant chi-square change test and the lowest AIC, BIC, SABIC, and DIC values, are noted by the outlined and bolded text. If fit statistics identify more than one model as best fitting, the model with the most model fit statistics indicating best fit was selected.

Supplemental Table 4. Unstandardized Path and Moderator Estimates for the Full and Best-Fitting Pubertal Moderation Models for Post-hoc Analyses that Regress Binge Eating Out of Weight/Shape Concerns and Regress Weight/Shape Concerns Out of Binge Eating (N=926 twins)

| Model                                                                  | Path Estimates                  |                                    |                                    | Linear Moderator Estimates |                                   |                       | Nonlinear Moderator Estimates |                        |                        |
|------------------------------------------------------------------------|---------------------------------|------------------------------------|------------------------------------|----------------------------|-----------------------------------|-----------------------|-------------------------------|------------------------|------------------------|
|                                                                        | a                               | c                                  | e                                  | $\beta_X$                  | $\beta_Y$                         | $\beta_Z$             | $\beta_X^2$                   | $\beta_Y^2$            | $\beta_Z^2$            |
| <b><u>Total Score Recalculated without Binge Eating Items</u></b>      |                                 |                                    |                                    |                            |                                   |                       |                               |                        |                        |
| Full Model                                                             | .42<br>(-.98, .98)              | -.53<br>(-.94, .94)                | -.87<br>(-1.00, -.66)              | .38<br>(-5.00, 5.00)       | 5.87<br>(-6.00, 6.00)             | .43<br>(-1.20, 1.50)  | -2.85<br>(-9.00, 9.00)        | -8.16<br>(-9.00, 9.00) | -1.00<br>(-3.00, 1.66) |
| No Mods                                                                | .44<br>(-.57, .57)              | .00<br>(-.38, .38)                 | <b>-.89</b><br><b>(-.97, -.83)</b> | -                          | -                                 | -                     | -                             | -                      | -                      |
| <b><u>Body Dissatisfaction with Binge Eating Regressed Out</u></b>     |                                 |                                    |                                    |                            |                                   |                       |                               |                        |                        |
| Full Model                                                             | .08<br>(-.59, .76)              | -.67<br>(-.91, .91)                | <b>-.68</b><br><b>(-.88, -.56)</b> | 1.96<br>(-2.29, 5.00)      | 1.20<br>(-1.66, 3.88)             | -1.26<br>(-1.50, .23) | -1.94<br>(-8.65, 4.78)        | 1.45<br>(-6.24, 6.09)  | 2.22<br>(-0.19, 3.15)  |
| No Mods                                                                | <b>.60</b><br><b>(.35, .69)</b> | .00<br>(-.42, .42)                 | <b>-.80</b><br><b>(-.87, -.73)</b> | -                          | -                                 | -                     | -                             | -                      | -                      |
| <b><u>Weight/ Shape Concerns with Binge Eating Regressed Out</u></b>   |                                 |                                    |                                    |                            |                                   |                       |                               |                        |                        |
| Full Model                                                             | .30<br>(-.43, .69)              | -.13<br>(-.50, .44)                | <b>.75</b><br><b>(.52, .93)</b>    | 1.59<br>(-3.85, 5.00)      | 4.08<br>(-5.50, 5.50)             | -.04<br>(-1.50, 1.50) | -1.71<br>(-9.00, 7.98)        | -8.13<br>(-9.00, 9.00) | -.22<br>(-3.00, 2.39)  |
| No Mods                                                                | .65<br>(.49, .74)               | .00<br>(-.37, .37)                 | <b>-.71</b><br><b>(-.78, -.65)</b> | -                          | -                                 | -                     | -                             | -                      | -                      |
| <b><u>Weight Preoccupation with Binge Eating Regressed Out</u></b>     |                                 |                                    |                                    |                            |                                   |                       |                               |                        |                        |
| Full Model                                                             | -.17<br>(-.66, .57)             | -.50<br>(-.81, .08)                | <b>-.77</b><br><b>(-.97, -.58)</b> | 4.62<br>(-5.00, 5.00)      | -.12<br>(-4.35, 4.02)             | -.10<br>(-1.50, 1.49) | -8.84<br>(-9.00, 9.00)        | .24<br>(-7.09, 8.10)   | .02<br>(-2.51, 2.44)   |
| No Mods                                                                | .00<br>(-.53, .53)              | <b>-.56</b><br><b>(-.64, -.28)</b> | <b>-.82</b><br><b>(-.88, -.76)</b> | -                          | -                                 | -                     | -                             | -                      | -                      |
| <b><u>Binge Eating with recalculated Total Score Regressed Out</u></b> |                                 |                                    |                                    |                            |                                   |                       |                               |                        |                        |
| Full Model                                                             | -.01<br>(-.48, .45)             | .04<br>(-.26, .33)                 | <b>-.83</b><br><b>(-.95, -.67)</b> | .74<br>(-5.00, 4.77)       | <b>4.37</b><br><b>(.79, 6.00)</b> | .99<br>(-.24, 1.50)   | 1.09<br>(-6.13, 9.00)         | -7.46<br>(-9.00, 9.00) | -1.73<br>(-3.00, .33)  |
| No E Mods                                                              | .26                             | .08                                | <b>-.74</b>                        | <b>-1.90</b>               | <b>4.16</b>                       | -                     | -                             | <b>-7.46</b>           | -                      |
| No Nonlinear A                                                         | (-.32, .54)                     | (-.18, .34)                        | <b>(-.80, -.68)</b>                | <b>(-2.55, -.79)</b>       | <b>(1.67, 5.70)</b>               | -                     | -                             | <b>(-9.00, -2.94)</b>  | -                      |

Supplemental Table 4. Unstandardized Path and Moderator Estimates for the Full and Best-Fitting Pubertal Moderation Models for Post-hoc Analyses that Regress Binge Eating Out of Weight/Shape Concerns and Regress Weight/Shape Concerns Out of Binge Eating (N=926 twins)

| Model                                                        | Path Estimates     |                    |                                     | Linear Moderator Estimates |                       |                      | Nonlinear Moderator Estimates |                        |                       |
|--------------------------------------------------------------|--------------------|--------------------|-------------------------------------|----------------------------|-----------------------|----------------------|-------------------------------|------------------------|-----------------------|
|                                                              | a                  | c                  | e                                   | $\beta_X$                  | $\beta_Y$             | $\beta_Z$            | $\beta_X^2$                   | $\beta_Y^2$            | $\beta_Z^2$           |
| <b>Binge Eating with Body Dissatisfaction Regressed Out</b>  |                    |                    |                                     |                            |                       |                      |                               |                        |                       |
| Full Model                                                   | .04<br>(-.41, .44) | .05<br>(-.27, .35) | <b>-.84</b><br><b>(-.98, -.71)</b>  | 1.62<br>(-5.00, 5.00)      | 4.30<br>(-5.97, 5.97) | .84<br>(-.37, 1.50)  | -.96<br>(-9.00, 9.00)         | -8.16<br>(-9.00, 9.00) | -1.46<br>(-3.00, .65) |
| No E Mods                                                    | .07                | .08                | <b>-.78</b>                         | <b>-1.36</b>               | <b>4.23</b>           | -                    | -                             | <b>-8.07</b>           | -                     |
| No Nonlinear A                                               | (-.40, .47)        | (-.26, .35)        | <b>(-.84, -.71)</b>                 | <b>(-2.19, -.43)</b>       | <b>(1.75, 5.45)</b>   | -                    | -                             | <b>(-9.00, -3.49)</b>  | -                     |
| <b>Binge Eating with Weight/Shape Concerns Regressed Out</b> |                    |                    |                                     |                            |                       |                      |                               |                        |                       |
| Full Model                                                   | .01<br>(-.43, .43) | .00<br>(-.33, .34) | <b>-.91</b><br><b>(-1.00, -.77)</b> | 3.32<br>(-5.00, 5.00)      | 3.90<br>(-6.00, 6.00) | 1.25<br>(-.03, 1.50) | -6.73<br>(-9.00, 9.00)        | -5.91<br>(-9.00, 9.00) | -2.31<br>(-3.00, .08) |
| No E Mods                                                    | .15                | .03                | <b>-.82</b>                         | <b>-1.26</b>               | <b>4.35</b>           | -                    | -                             | <b>-7.67</b>           | -                     |
| No Nonlinear A                                               | (-.41, .52)        | (-.30, .31)        | <b>(-.88, -.76)</b>                 | <b>(-2.09, -.04)</b>       | <b>(1.90, 5.78)</b>   | -                    | -                             | <b>(-9.00, -3.26)</b>  | -                     |
| <b>Binge Eating with Weight Preoccupation Regressed Out</b>  |                    |                    |                                     |                            |                       |                      |                               |                        |                       |
| Full Model                                                   | .01<br>(-.44, .40) | .08<br>(-.41, .42) | <b>-.82</b><br><b>(-.96, -.69)</b>  | 3.28<br>(-5.00, 5.00)      | 3.22<br>(-6.00, 6.00) | .84<br>(-0.58, 1.50) | -4.52<br>(-9.00, 9.00)        | -6.88<br>(-9.00, 9.00) | -1.91<br>(-3.00, .57) |
| No E Mods                                                    | .06                | .03                | <b>-.81</b>                         | <b>-1.31</b>               | <b>4.30</b>           | -                    | -                             | <b>-8.27</b>           | -                     |
| No Nonlinear A                                               | (-.33, .41)        | (-.25, .31)        | <b>(-.87, -.75)</b>                 | <b>(-2.07, -.52)</b>       | <b>(1.79, 5.45)</b>   | -                    | -                             | <b>(-9.00, -3.65)</b>  | -                     |

*Note.* MEBS= Minnesota Eating Behavior Survey; a = genetic path estimate; c = shared environmental path estimate; e = non-shared environmental path estimate;  $\beta_X$  = linear moderator of genetic path estimate;  $\beta_Y$  = linear moderator of shared environmental path estimate;  $\beta_Z$  = linear moderator of non-shared environmental path estimates;  $\beta_X^2$  = nonlinear moderator of genetic path estimate;  $\beta_Y^2$  = nonlinear moderator of shared environmental path estimate;  $\beta_Z^2$  = nonlinear moderator of non-shared environmental path estimate. Estimates are followed by 95% confidence intervals in parentheses. Confidence intervals that do not overlap with zero indicate statistical significance (bolded) at  $p < .05$ . In the “Full” model, genetic, shared environmental, and non-shared environmental estimates are allowed to vary both linearly and nonlinearly across levels of the moderator (i.e., pubertal development). The best fitting model is listed below the full model and denoted by an asterisk.

## HERITABILITY OF BODY WEIGHT AND SHAPE CONCERNS

Supplemental Figure 1. Unstandardized Estimates of Additive Genetic (a), Shared Environmental (c), and Nonshared Environmental (e) Effects from the Full and Best-Fitting Models for Total Score, Body Dissatisfaction, Weight/Shape Concerns and Weight Preoccupation all with Binge Eating, Age, and BMI regressed out and then Full and Best-Fitting Models for Binge Eating with Body Dissatisfaction, Weight/Shape Concerns, and Weight Preoccupation regressed out with age and BMI. Although log-transformed PDS scores that were floored to 0 were used in all models (see Methods), raw PDS scores are depicted here for ease of interpretation.

# HERITABILITY OF BODY WEIGHT AND SHAPE CONCERNS

## Full Model

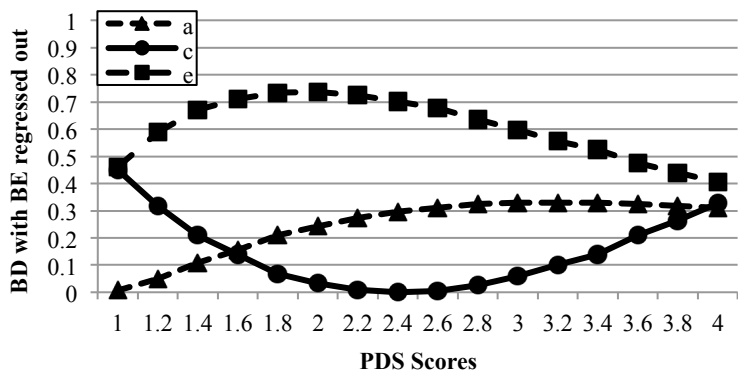

## Best-Fitting Model

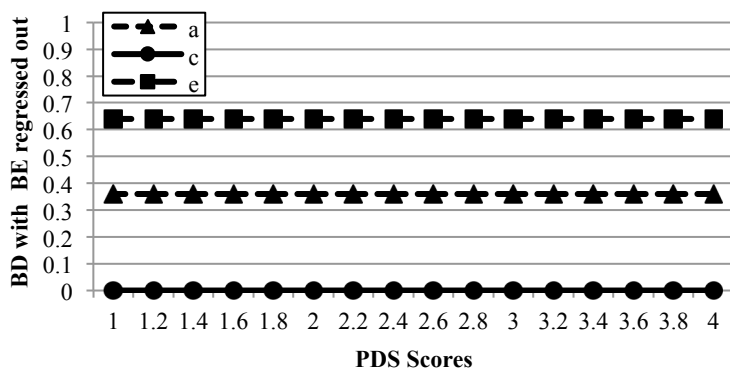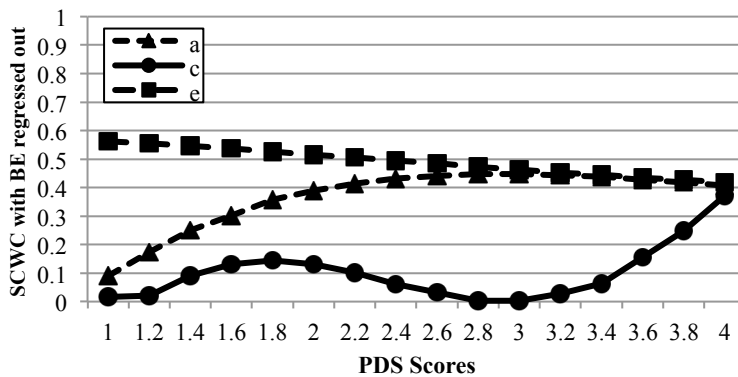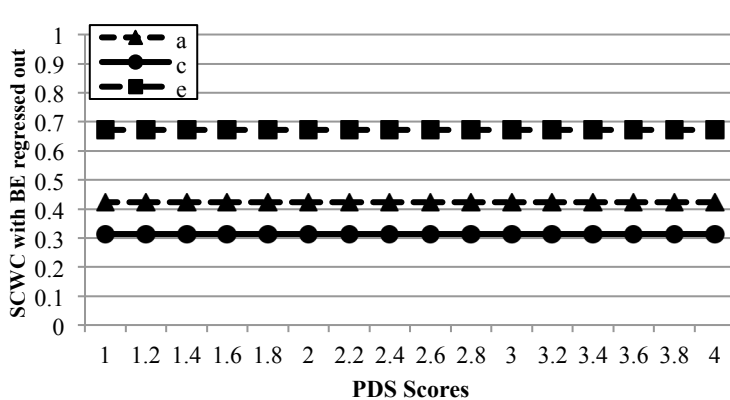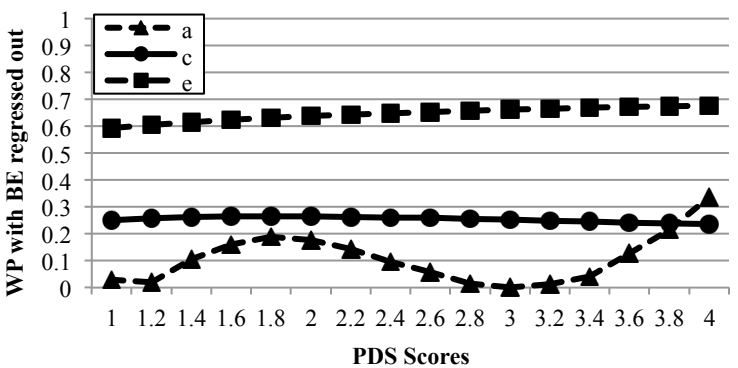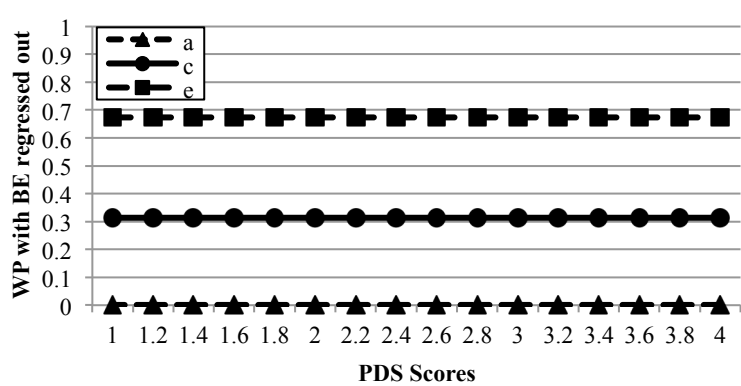



# HERITABILITY OF BODY WEIGHT AND SHAPE CONCERNS

## Full Model

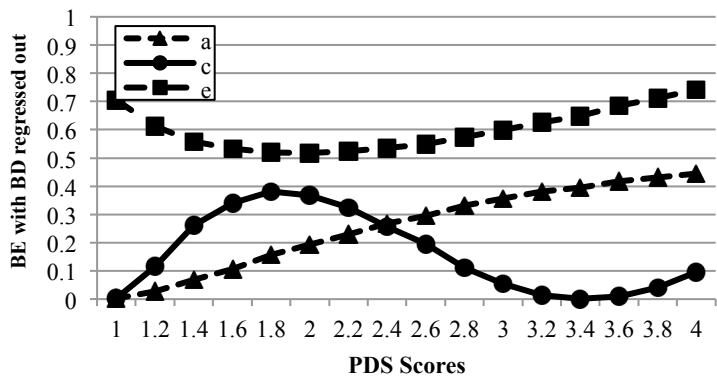

## Best-Fitting Model

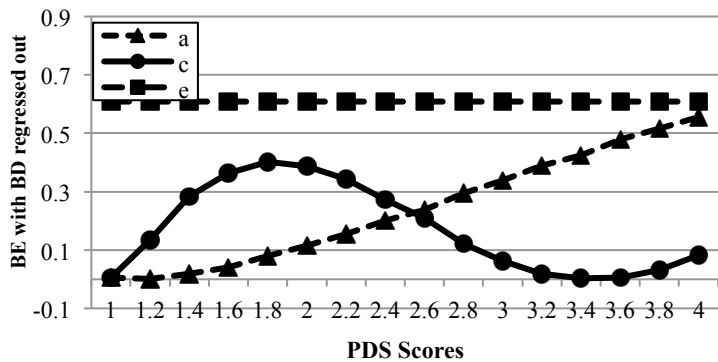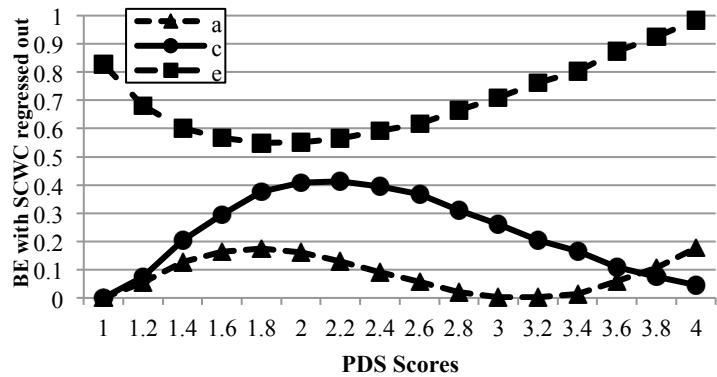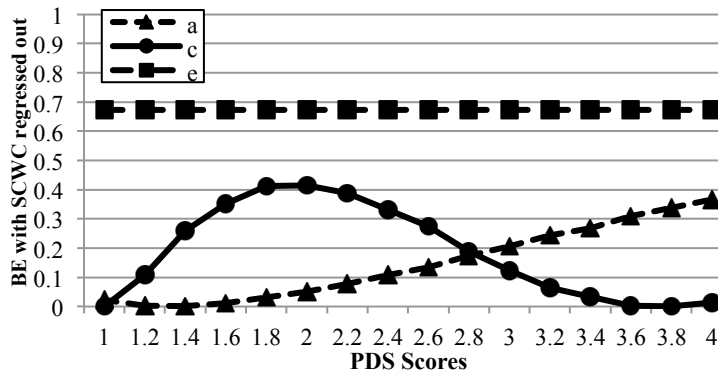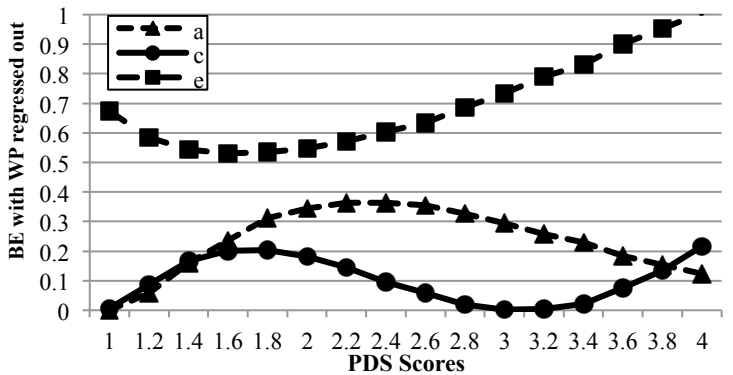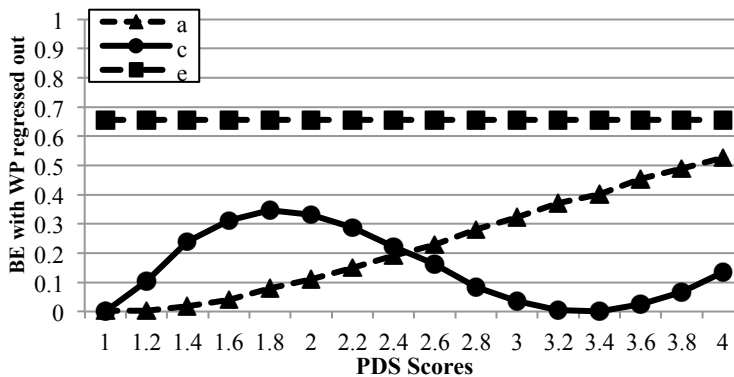

## Supplemental Materials 1. Extended Univariate Mx Script

```
!EXTENDED UNIVARIATE SCRIPT
VARIABLE PEDIGREE EXAMPLE FOR NEAD DATA
DATA CALCULATION NG=3
BEGIN MATRICES;
  A full 1 1 free      ! genetic path coefficients
  C full 1 1 free      ! shared environment path coefficients
  E full 1 1 free      ! nonshared environment path coefficients
  T full 1 1 free      ! moderated genetic
  U full 1 1 free      ! moderated shared env
  V full 1 1 free      ! moderated nonshared env
  X full 1 1 free      ! quadratic moderation of A
  Y full 1 1 free      ! quadratic moderation of C
  Z full 1 1 free      ! quadratic moderation of E
  M full 1 1 free      ! grand mean MZ
  N full 1 1 free      ! grand mean DZ
  B full 1 1 free      ! moderator-linked mean model MZ1
  D full 1 1 free      ! moderator-linked mean model DZ1
  F full 1 1 free      ! moderator-linked mean model MZ2
  G full 1 1 free      ! moderator-linked mean model DZ2
  R full 1 1 free      ! twin 1 moderator (definition variable)
  S full 1 1 free      ! twin 2 moderator (definition variable)
  H full 1 1
  I full 1 1
END MATRICES;
Ma T 0.5
Ma U 1
Ma V 1
Ma X 0
Ma Y 0
Ma Z 0
Ma M 0
Ma B 0.2
Ma N 0.1
Ma F 0.2
Ma G 0.4
Ma D 0.2
Ma A 0.3
Ma C 0.4
Ma E 0.5
MATRIX H
0.5
BO -1 1 all
BO -5 5 T 1 1
BO -6 6 U 1 1
BO -1.5 1.5 V 1 1
BO -9 9 X 1 1
BO -9 9 Y 1 1
BO -3 3.5 Z 1 1
OPTIONS NO_Output JIGGLE TH=12
```

END

GROUP #3 IS mz  
DATA NI=5  
MISSING =9999.000  
RECTANGULAR FILE=[ENTER PATHWAY TO .DAT FILE HERE]  
LABELS Zyg MEBS MEBSb Pub Pubb  
SELECT IF Zyg = 1 / ! THESE ARE THE MZs  
SELECT MEBS MEBSb Pub Pubb /  
DEFINITION Pub Pubb /  
MATRICES = GROUP 1  
Means  $M + B*R + F*S \mid M + F*S + B*R /$   
Covariance  
 $(A+T*R+X*R*R)*(A+T*R+X*R*R)' + (C+U*R+Y*R*R)*(C+U*R+Y*R*R)' +$   
 $(E+V*R+Z*R*R)*(E+V*R+Z*R*R)'$   
 $\mid (A+T*R+X*R*R)*(A+T*S+X*S*S)' + (C+U*R+Y*R*R)*(C+U*S+Y*S*S)'$   
 $\_ (A+T*S+X*S*S)*(A+T*R+X*R*R)' + (C+U*S+Y*S*S)*(C+U*R+Y*R*R)'$   
 $\mid (A+T*S+X*S*S)*(A+T*S+X*S*S)' + (C+U*S+Y*S*S)*(C+U*S+Y*S*S)' +$   
 $(E+V*S+Z*S*S)*(E+V*S+Z*S*S)' /$   
! twin 1 MODERATOR VARIABLE  
SPECIFY R -1  
! twin 2 MODERATOR VARIABLE  
SPECIFY S -2  
END

GROUP #2 IS dz  
DATA NI=5  
MISSING =9999.000  
RECTANGULAR FILE=[ENTER PATHWAY TO .DAT FILE HERE]  
LABELS Zyg MEBS MEBSb Pub Pubb  
SELECT IF Zyg = 2 / ! THESE ARE THE DZs  
SELECT MEBS MEBSb Pub Pubb /  
DEFINITION Pub Pubb /  
MATRICES = GROUP 1  
Means  $N + D*R + G*S \mid N + G*S + D*R /$   
Covariance  
 $(A+T*R+X*R*R)*(A+T*R+X*R*R)' + (C+U*R+Y*R*R)*(C+U*R+Y*R*R)' +$   
 $(E+V*R+Z*R*R)*(E+V*R+Z*R*R)'$   
 $\mid H@(A+T*R+X*R*R)*(A+T*S+X*S*S)' + (C+U*R+Y*R*R)*(C+U*S+Y*S*S)'$   
 $\_ H@(A+T*S+X*S*S)*(A+T*R+X*R*R)' + (C+U*S+Y*S*S)*(C+U*R+Y*R*R)'$   
 $\mid (A+T*S+X*S*S)*(A+T*S+X*S*S)' + (C+U*S+Y*S*S)*(C+U*S+Y*S*S)' +$   
 $(E+V*S+Z*S*S)*(E+V*S+Z*S*S)' /$   
! twin 1 MODERATOR VARIABLE  
SPECIFY R -1  
! twin 2 MODERATOR VARIABLE  
SPECIFY S -2  
END
